# Supplementary material for: Association Analysis of Tiller-Related Traits with EST-SSR Markers in Psathyrostachys juncea
Source: MDPI journal article supplement (doi:10.3390/genes14101970), 2023-10-21
Supplement: s1 [file s1]

**Table S3** Q value of 480 *P. juncea* individuals in five groups

| No. | Q1    | Q2    | Q3    | Q4    | Q5    | Group | No. | Q1    | Q2    | Q3    | Q4    | Q5    | Group |
|-----|-------|-------|-------|-------|-------|-------|-----|-------|-------|-------|-------|-------|-------|
| 1   | 0.002 | 0.002 | 0.004 | 0.990 | 0.003 | 4     | 241 | 0.001 | 0.001 | 0.038 | 0.001 | 0.958 | 5     |
| 2   | 0.001 | 0.001 | 0.001 | 0.996 | 0.001 | 4     | 242 | 0.001 | 0.001 | 0.006 | 0.001 | 0.992 | 5     |
| 3   | 0.001 | 0.001 | 0.001 | 0.996 | 0.001 | 4     | 243 | 0.001 | 0.001 | 0.005 | 0.001 | 0.993 | 5     |
| 4   | 0.001 | 0.001 | 0.001 | 0.997 | 0.001 | 4     | 244 | 0.001 | 0.001 | 0.005 | 0.001 | 0.993 | 5     |
| 5   | 0.001 | 0.001 | 0.001 | 0.995 | 0.001 | 4     | 245 | 0.002 | 0.001 | 0.979 | 0.001 | 0.017 | 3     |
| 6   | 0.001 | 0.001 | 0.001 | 0.995 | 0.001 | 4     | 246 | 0.001 | 0.001 | 0.994 | 0.001 | 0.004 | 3     |
| 7   | 0.002 | 0.001 | 0.001 | 0.995 | 0.001 | 4     | 247 | 0.002 | 0.001 | 0.978 | 0.001 | 0.017 | 3     |
| 8   | 0.001 | 0.001 | 0.002 | 0.993 | 0.003 | 4     | 248 | 0.001 | 0.001 | 0.992 | 0.001 | 0.006 | 3     |
| 9   | 0.001 | 0.001 | 0.001 | 0.997 | 0.001 | 4     | 249 | 0.003 | 0.001 | 0.986 | 0.006 | 0.004 | 3     |
| 10  | 0.002 | 0.001 | 0.001 | 0.995 | 0.001 | 4     | 250 | 0.004 | 0.002 | 0.953 | 0.001 | 0.041 | 3     |
| 11  | 0.001 | 0.002 | 0.001 | 0.995 | 0.001 | 4     | 251 | 0.001 | 0.001 | 0.988 | 0.001 | 0.009 | 3     |
| 12  | 0.002 | 0.001 | 0.001 | 0.995 | 0.001 | 4     | 252 | 0.001 | 0.001 | 0.995 | 0.000 | 0.003 | 3     |
| 13  | 0.001 | 0.002 | 0.001 | 0.996 | 0.001 | 4     | 253 | 0.003 | 0.002 | 0.979 | 0.001 | 0.015 | 3     |
| 14  | 0.003 | 0.001 | 0.002 | 0.992 | 0.002 | 4     | 254 | 0.001 | 0.001 | 0.993 | 0.000 | 0.005 | 3     |
| 15  | 0.002 | 0.001 | 0.003 | 0.985 | 0.008 | 4     | 255 | 0.002 | 0.001 | 0.943 | 0.002 | 0.053 | 3     |
| 16  | 0.001 | 0.001 | 0.002 | 0.994 | 0.002 | 4     | 256 | 0.001 | 0.001 | 0.982 | 0.001 | 0.015 | 3     |
| 17  | 0.002 | 0.002 | 0.002 | 0.992 | 0.002 | 4     | 257 | 0.003 | 0.001 | 0.447 | 0.001 | 0.548 | 5     |
| 18  | 0.001 | 0.001 | 0.001 | 0.994 | 0.002 | 4     | 258 | 0.001 | 0.001 | 0.994 | 0.001 | 0.004 | 3     |
| 19  | 0.002 | 0.001 | 0.001 | 0.995 | 0.001 | 4     | 259 | 0.001 | 0.001 | 0.997 | 0.000 | 0.001 | 3     |
| 20  | 0.003 | 0.002 | 0.001 | 0.993 | 0.001 | 4     | 260 | 0.001 | 0.001 | 0.994 | 0.000 | 0.004 | 3     |
| 21  | 0.001 | 0.001 | 0.001 | 0.996 | 0.001 | 4     | 261 | 0.001 | 0.001 | 0.996 | 0.000 | 0.003 | 3     |
| 22  | 0.002 | 0.002 | 0.001 | 0.994 | 0.001 | 4     | 262 | 0.001 | 0.001 | 0.995 | 0.000 | 0.003 | 3     |
| 23  | 0.002 | 0.001 | 0.001 | 0.996 | 0.001 | 4     | 263 | 0.001 | 0.001 | 0.994 | 0.000 | 0.004 | 3     |
| 24  | 0.002 | 0.002 | 0.001 | 0.995 | 0.001 | 4     | 264 | 0.001 | 0.001 | 0.990 | 0.001 | 0.008 | 3     |
| 25  | 0.001 | 0.001 | 0.001 | 0.996 | 0.002 | 4     | 265 | 0.001 | 0.001 | 0.996 | 0.001 | 0.002 | 3     |
| 26  | 0.001 | 0.005 | 0.002 | 0.990 | 0.003 | 4     | 266 | 0.001 | 0.001 | 0.992 | 0.000 | 0.006 | 3     |
| 27  | 0.001 | 0.001 | 0.001 | 0.996 | 0.001 | 4     | 267 | 0.001 | 0.001 | 0.995 | 0.000 | 0.003 | 3     |
| 28  | 0.001 | 0.001 | 0.001 | 0.995 | 0.001 | 4     | 268 | 0.001 | 0.001 | 0.993 | 0.000 | 0.005 | 3     |
| 29  | 0.002 | 0.001 | 0.001 | 0.996 | 0.001 | 4     | 269 | 0.001 | 0.000 | 0.996 | 0.000 | 0.002 | 3     |
| 30  | 0.001 | 0.001 | 0.002 | 0.994 | 0.002 | 4     | 270 | 0.001 | 0.001 | 0.993 | 0.001 | 0.005 | 3     |
| 31  | 0.001 | 0.001 | 0.008 | 0.983 | 0.007 | 4     | 271 | 0.001 | 0.001 | 0.995 | 0.000 | 0.003 | 3     |
| 32  | 0.001 | 0.001 | 0.002 | 0.994 | 0.002 | 4     | 272 | 0.001 | 0.001 | 0.995 | 0.000 | 0.004 | 3     |
| 33  | 0.001 | 0.001 | 0.002 | 0.995 | 0.001 | 4     | 273 | 0.001 | 0.001 | 0.996 | 0.000 | 0.002 | 3     |
| 34  | 0.001 | 0.001 | 0.001 | 0.997 | 0.001 | 4     | 274 | 0.001 | 0.001 | 0.995 | 0.001 | 0.003 | 3     |
| 35  | 0.002 | 0.002 | 0.001 | 0.994 | 0.001 | 4     | 275 | 0.001 | 0.001 | 0.994 | 0.001 | 0.004 | 3     |
| 36  | 0.001 | 0.001 | 0.001 | 0.995 | 0.001 | 4     | 276 | 0.001 | 0.001 | 0.995 | 0.001 | 0.003 | 3     |
| 37  | 0.002 | 0.001 | 0.002 | 0.991 | 0.003 | 4     | 277 | 0.001 | 0.001 | 0.985 | 0.001 | 0.013 | 3     |

| No. | Q1    | Q2    | Q3    | Q4    | Q5    | Group | No. | Q1    | Q2    | Q3    | Q4    | Q5    | Group |
|-----|-------|-------|-------|-------|-------|-------|-----|-------|-------|-------|-------|-------|-------|
| 38  | 0.003 | 0.001 | 0.001 | 0.995 | 0.001 | 4     | 278 | 0.002 | 0.002 | 0.992 | 0.001 | 0.003 | 3     |
| 39  | 0.002 | 0.001 | 0.001 | 0.993 | 0.002 | 4     | 279 | 0.001 | 0.001 | 0.993 | 0.000 | 0.005 | 3     |
| 40  | 0.001 | 0.001 | 0.001 | 0.997 | 0.001 | 4     | 280 | 0.001 | 0.001 | 0.984 | 0.001 | 0.013 | 3     |
| 41  | 0.003 | 0.001 | 0.001 | 0.995 | 0.001 | 4     | 281 | 0.001 | 0.001 | 0.994 | 0.001 | 0.003 | 3     |
| 42  | 0.002 | 0.001 | 0.002 | 0.992 | 0.004 | 4     | 282 | 0.001 | 0.001 | 0.996 | 0.001 | 0.002 | 3     |
| 43  | 0.002 | 0.001 | 0.001 | 0.994 | 0.002 | 4     | 283 | 0.001 | 0.001 | 0.996 | 0.001 | 0.002 | 3     |
| 44  | 0.003 | 0.001 | 0.000 | 0.995 | 0.001 | 4     | 284 | 0.001 | 0.001 | 0.994 | 0.001 | 0.005 | 3     |
| 45  | 0.002 | 0.001 | 0.001 | 0.995 | 0.001 | 4     | 285 | 0.001 | 0.000 | 0.997 | 0.000 | 0.001 | 3     |
| 46  | 0.001 | 0.001 | 0.000 | 0.996 | 0.001 | 4     | 286 | 0.001 | 0.001 | 0.996 | 0.000 | 0.002 | 3     |
| 47  | 0.001 | 0.001 | 0.001 | 0.996 | 0.001 | 4     | 287 | 0.001 | 0.001 | 0.995 | 0.001 | 0.002 | 3     |
| 48  | 0.002 | 0.001 | 0.001 | 0.996 | 0.001 | 4     | 288 | 0.001 | 0.001 | 0.994 | 0.000 | 0.004 | 3     |
| 49  | 0.002 | 0.001 | 0.001 | 0.995 | 0.001 | 4     | 289 | 0.005 | 0.960 | 0.005 | 0.020 | 0.009 | 2     |
| 50  | 0.005 | 0.001 | 0.001 | 0.992 | 0.001 | 4     | 290 | 0.002 | 0.984 | 0.005 | 0.004 | 0.004 | 2     |
| 51  | 0.004 | 0.001 | 0.001 | 0.993 | 0.001 | 4     | 291 | 0.003 | 0.988 | 0.005 | 0.002 | 0.002 | 2     |
| 52  | 0.004 | 0.002 | 0.002 | 0.991 | 0.002 | 4     | 292 | 0.003 | 0.991 | 0.001 | 0.004 | 0.001 | 2     |
| 53  | 0.002 | 0.001 | 0.004 | 0.992 | 0.002 | 4     | 293 | 0.003 | 0.992 | 0.002 | 0.002 | 0.001 | 2     |
| 54  | 0.001 | 0.002 | 0.002 | 0.994 | 0.002 | 4     | 294 | 0.002 | 0.992 | 0.002 | 0.003 | 0.001 | 2     |
| 55  | 0.001 | 0.001 | 0.001 | 0.996 | 0.001 | 4     | 295 | 0.003 | 0.989 | 0.002 | 0.004 | 0.002 | 2     |
| 56  | 0.001 | 0.001 | 0.001 | 0.996 | 0.001 | 4     | 296 | 0.006 | 0.987 | 0.003 | 0.002 | 0.002 | 2     |
| 57  | 0.002 | 0.001 | 0.001 | 0.995 | 0.001 | 4     | 297 | 0.003 | 0.981 | 0.002 | 0.012 | 0.002 | 2     |
| 58  | 0.001 | 0.002 | 0.002 | 0.994 | 0.001 | 4     | 298 | 0.013 | 0.940 | 0.019 | 0.020 | 0.009 | 2     |
| 59  | 0.002 | 0.001 | 0.002 | 0.993 | 0.002 | 4     | 299 | 0.002 | 0.992 | 0.001 | 0.003 | 0.001 | 2     |
| 60  | 0.002 | 0.002 | 0.003 | 0.992 | 0.001 | 4     | 300 | 0.002 | 0.991 | 0.003 | 0.002 | 0.002 | 2     |
| 61  | 0.002 | 0.002 | 0.001 | 0.993 | 0.002 | 4     | 301 | 0.002 | 0.993 | 0.002 | 0.002 | 0.001 | 2     |
| 62  | 0.004 | 0.003 | 0.005 | 0.984 | 0.004 | 4     | 302 | 0.002 | 0.992 | 0.003 | 0.002 | 0.002 | 2     |
| 63  | 0.002 | 0.001 | 0.001 | 0.996 | 0.001 | 4     | 303 | 0.002 | 0.991 | 0.003 | 0.002 | 0.003 | 2     |
| 64  | 0.002 | 0.002 | 0.004 | 0.990 | 0.003 | 4     | 304 | 0.001 | 0.995 | 0.001 | 0.002 | 0.001 | 2     |
| 65  | 0.002 | 0.001 | 0.002 | 0.993 | 0.002 | 4     | 305 | 0.002 | 0.986 | 0.003 | 0.003 | 0.006 | 2     |
| 66  | 0.002 | 0.001 | 0.002 | 0.992 | 0.002 | 4     | 306 | 0.002 | 0.989 | 0.003 | 0.005 | 0.002 | 2     |
| 67  | 0.001 | 0.001 | 0.001 | 0.996 | 0.001 | 4     | 307 | 0.008 | 0.937 | 0.020 | 0.008 | 0.027 | 2     |
| 68  | 0.001 | 0.001 | 0.002 | 0.995 | 0.001 | 4     | 308 | 0.003 | 0.989 | 0.003 | 0.002 | 0.002 | 2     |
| 69  | 0.003 | 0.004 | 0.003 | 0.989 | 0.001 | 4     | 309 | 0.004 | 0.986 | 0.003 | 0.004 | 0.002 | 2     |
| 70  | 0.001 | 0.002 | 0.001 | 0.996 | 0.001 | 4     | 310 | 0.004 | 0.988 | 0.003 | 0.002 | 0.003 | 2     |
| 71  | 0.001 | 0.001 | 0.001 | 0.996 | 0.001 | 4     | 311 | 0.004 | 0.990 | 0.002 | 0.001 | 0.003 | 2     |
| 72  | 0.002 | 0.002 | 0.006 | 0.987 | 0.003 | 4     | 312 | 0.037 | 0.930 | 0.013 | 0.003 | 0.017 | 2     |
| 73  | 0.002 | 0.002 | 0.001 | 0.995 | 0.001 | 4     | 313 | 0.003 | 0.991 | 0.002 | 0.001 | 0.002 | 2     |
| 74  | 0.002 | 0.001 | 0.002 | 0.993 | 0.001 | 4     | 314 | 0.002 | 0.981 | 0.008 | 0.001 | 0.008 | 2     |
| 75  | 0.002 | 0.001 | 0.001 | 0.995 | 0.001 | 4     | 315 | 0.003 | 0.986 | 0.007 | 0.001 | 0.003 | 2     |
| 76  | 0.003 | 0.003 | 0.016 | 0.973 | 0.005 | 4     | 316 | 0.002 | 0.985 | 0.005 | 0.002 | 0.005 | 2     |

| No. | Q1    | Q2    | Q3    | Q4    | Q5    | Group | No. | Q1    | Q2    | Q3    | Q4    | Q5    | Group |
|-----|-------|-------|-------|-------|-------|-------|-----|-------|-------|-------|-------|-------|-------|
| 77  | 0.005 | 0.001 | 0.002 | 0.991 | 0.001 | 4     | 317 | 0.003 | 0.987 | 0.004 | 0.003 | 0.004 | 2     |
| 78  | 0.002 | 0.001 | 0.001 | 0.995 | 0.001 | 4     | 318 | 0.002 | 0.983 | 0.003 | 0.007 | 0.004 | 2     |
| 79  | 0.001 | 0.002 | 0.002 | 0.994 | 0.001 | 4     | 319 | 0.003 | 0.983 | 0.005 | 0.004 | 0.005 | 2     |
| 80  | 0.003 | 0.002 | 0.003 | 0.991 | 0.002 | 4     | 320 | 0.003 | 0.979 | 0.005 | 0.005 | 0.008 | 2     |
| 81  | 0.002 | 0.001 | 0.001 | 0.995 | 0.001 | 4     | 321 | 0.006 | 0.973 | 0.015 | 0.002 | 0.004 | 2     |
| 82  | 0.001 | 0.001 | 0.001 | 0.996 | 0.001 | 4     | 322 | 0.002 | 0.991 | 0.004 | 0.001 | 0.002 | 2     |
| 83  | 0.002 | 0.001 | 0.001 | 0.996 | 0.001 | 4     | 323 | 0.002 | 0.991 | 0.003 | 0.002 | 0.002 | 2     |
| 84  | 0.005 | 0.002 | 0.003 | 0.987 | 0.003 | 4     | 324 | 0.002 | 0.993 | 0.001 | 0.003 | 0.001 | 2     |
| 85  | 0.002 | 0.001 | 0.001 | 0.995 | 0.001 | 4     | 325 | 0.002 | 0.993 | 0.003 | 0.001 | 0.002 | 2     |
| 86  | 0.001 | 0.001 | 0.001 | 0.996 | 0.001 | 4     | 326 | 0.004 | 0.982 | 0.005 | 0.006 | 0.004 | 2     |
| 87  | 0.001 | 0.001 | 0.001 | 0.996 | 0.001 | 4     | 327 | 0.002 | 0.994 | 0.001 | 0.001 | 0.001 | 2     |
| 88  | 0.002 | 0.001 | 0.001 | 0.996 | 0.001 | 4     | 328 | 0.003 | 0.988 | 0.003 | 0.004 | 0.002 | 2     |
| 89  | 0.002 | 0.002 | 0.002 | 0.993 | 0.002 | 4     | 329 | 0.002 | 0.995 | 0.001 | 0.001 | 0.001 | 2     |
| 90  | 0.001 | 0.001 | 0.002 | 0.994 | 0.002 | 4     | 330 | 0.001 | 0.993 | 0.002 | 0.001 | 0.003 | 2     |
| 91  | 0.005 | 0.001 | 0.001 | 0.992 | 0.001 | 4     | 331 | 0.003 | 0.966 | 0.004 | 0.003 | 0.023 | 2     |
| 92  | 0.002 | 0.002 | 0.002 | 0.992 | 0.003 | 4     | 332 | 0.001 | 0.993 | 0.002 | 0.002 | 0.002 | 2     |
| 93  | 0.003 | 0.001 | 0.001 | 0.993 | 0.001 | 4     | 333 | 0.003 | 0.961 | 0.004 | 0.005 | 0.028 | 2     |
| 94  | 0.001 | 0.002 | 0.001 | 0.995 | 0.001 | 4     | 334 | 0.001 | 0.995 | 0.001 | 0.001 | 0.001 | 2     |
| 95  | 0.002 | 0.002 | 0.002 | 0.993 | 0.001 | 4     | 335 | 0.002 | 0.989 | 0.003 | 0.002 | 0.004 | 2     |
| 96  | 0.002 | 0.002 | 0.001 | 0.993 | 0.003 | 4     | 336 | 0.003 | 0.985 | 0.007 | 0.001 | 0.005 | 2     |
| 97  | 0.994 | 0.001 | 0.001 | 0.001 | 0.003 | 1     | 337 | 0.002 | 0.992 | 0.003 | 0.001 | 0.002 | 2     |
| 98  | 0.995 | 0.002 | 0.001 | 0.001 | 0.001 | 1     | 338 | 0.002 | 0.994 | 0.002 | 0.001 | 0.001 | 2     |
| 99  | 0.996 | 0.001 | 0.001 | 0.001 | 0.001 | 1     | 339 | 0.002 | 0.982 | 0.005 | 0.002 | 0.009 | 2     |
| 100 | 0.997 | 0.001 | 0.001 | 0.001 | 0.001 | 1     | 340 | 0.004 | 0.988 | 0.003 | 0.002 | 0.003 | 2     |
| 101 | 0.995 | 0.001 | 0.001 | 0.002 | 0.001 | 1     | 341 | 0.002 | 0.991 | 0.002 | 0.002 | 0.002 | 2     |
| 102 | 0.989 | 0.002 | 0.003 | 0.002 | 0.004 | 1     | 342 | 0.003 | 0.977 | 0.009 | 0.003 | 0.008 | 2     |
| 103 | 0.996 | 0.001 | 0.001 | 0.001 | 0.001 | 1     | 343 | 0.001 | 0.970 | 0.012 | 0.006 | 0.011 | 2     |
| 104 | 0.996 | 0.001 | 0.001 | 0.001 | 0.001 | 1     | 344 | 0.002 | 0.989 | 0.004 | 0.002 | 0.004 | 2     |
| 105 | 0.993 | 0.001 | 0.002 | 0.001 | 0.003 | 1     | 345 | 0.001 | 0.991 | 0.002 | 0.002 | 0.003 | 2     |
| 106 | 0.997 | 0.001 | 0.001 | 0.001 | 0.001 | 1     | 346 | 0.002 | 0.989 | 0.002 | 0.002 | 0.005 | 2     |
| 107 | 0.997 | 0.001 | 0.000 | 0.001 | 0.001 | 1     | 347 | 0.002 | 0.990 | 0.003 | 0.002 | 0.003 | 2     |
| 108 | 0.997 | 0.001 | 0.001 | 0.001 | 0.001 | 1     | 348 | 0.003 | 0.989 | 0.002 | 0.002 | 0.005 | 2     |
| 109 | 0.996 | 0.001 | 0.001 | 0.001 | 0.001 | 1     | 349 | 0.003 | 0.981 | 0.005 | 0.003 | 0.008 | 2     |
| 110 | 0.997 | 0.001 | 0.001 | 0.001 | 0.001 | 1     | 350 | 0.006 | 0.932 | 0.027 | 0.012 | 0.024 | 2     |
| 111 | 0.993 | 0.002 | 0.001 | 0.001 | 0.003 | 1     | 351 | 0.002 | 0.993 | 0.001 | 0.002 | 0.001 | 2     |
| 112 | 0.998 | 0.001 | 0.001 | 0.001 | 0.000 | 1     | 352 | 0.002 | 0.994 | 0.001 | 0.002 | 0.001 | 2     |
| 113 | 0.996 | 0.002 | 0.001 | 0.001 | 0.001 | 1     | 353 | 0.002 | 0.994 | 0.001 | 0.002 | 0.001 | 2     |
| 114 | 0.997 | 0.001 | 0.001 | 0.001 | 0.001 | 1     | 354 | 0.017 | 0.959 | 0.018 | 0.003 | 0.003 | 2     |
| 115 | 0.997 | 0.001 | 0.001 | 0.001 | 0.001 | 1     | 355 | 0.002 | 0.938 | 0.009 | 0.036 | 0.015 | 2     |

| No. | Q1    | Q2    | Q3    | Q4    | Q5    | Group | No. | Q1    | Q2    | Q3    | Q4    | Q5    | Group |
|-----|-------|-------|-------|-------|-------|-------|-----|-------|-------|-------|-------|-------|-------|
| 116 | 0.997 | 0.001 | 0.001 | 0.001 | 0.001 | 1     | 356 | 0.005 | 0.984 | 0.002 | 0.007 | 0.002 | 2     |
| 117 | 0.997 | 0.001 | 0.001 | 0.001 | 0.001 | 1     | 357 | 0.003 | 0.989 | 0.002 | 0.003 | 0.003 | 2     |
| 118 | 0.997 | 0.001 | 0.001 | 0.001 | 0.001 | 1     | 358 | 0.008 | 0.945 | 0.023 | 0.002 | 0.021 | 2     |
| 119 | 0.996 | 0.001 | 0.001 | 0.001 | 0.001 | 1     | 359 | 0.002 | 0.978 | 0.009 | 0.003 | 0.008 | 2     |
| 120 | 0.997 | 0.001 | 0.001 | 0.001 | 0.001 | 1     | 360 | 0.005 | 0.985 | 0.002 | 0.003 | 0.005 | 2     |
| 121 | 0.992 | 0.004 | 0.001 | 0.001 | 0.001 | 1     | 361 | 0.002 | 0.994 | 0.002 | 0.001 | 0.001 | 2     |
| 122 | 0.995 | 0.001 | 0.001 | 0.001 | 0.001 | 1     | 362 | 0.004 | 0.954 | 0.008 | 0.009 | 0.025 | 2     |
| 123 | 0.995 | 0.002 | 0.001 | 0.001 | 0.001 | 1     | 363 | 0.006 | 0.982 | 0.005 | 0.002 | 0.005 | 2     |
| 124 | 0.994 | 0.001 | 0.002 | 0.002 | 0.001 | 1     | 364 | 0.003 | 0.970 | 0.018 | 0.002 | 0.006 | 2     |
| 125 | 0.995 | 0.002 | 0.001 | 0.001 | 0.001 | 1     | 365 | 0.008 | 0.986 | 0.002 | 0.002 | 0.001 | 2     |
| 126 | 0.996 | 0.001 | 0.001 | 0.002 | 0.001 | 1     | 366 | 0.003 | 0.978 | 0.002 | 0.014 | 0.004 | 2     |
| 127 | 0.996 | 0.001 | 0.001 | 0.001 | 0.001 | 1     | 367 | 0.002 | 0.989 | 0.001 | 0.006 | 0.001 | 2     |
| 128 | 0.996 | 0.001 | 0.001 | 0.001 | 0.001 | 1     | 368 | 0.002 | 0.990 | 0.002 | 0.005 | 0.002 | 2     |
| 129 | 0.996 | 0.001 | 0.001 | 0.001 | 0.001 | 1     | 369 | 0.002 | 0.986 | 0.005 | 0.002 | 0.004 | 2     |
| 130 | 0.997 | 0.001 | 0.001 | 0.001 | 0.001 | 1     | 370 | 0.004 | 0.913 | 0.046 | 0.002 | 0.035 | 2     |
| 131 | 0.997 | 0.001 | 0.001 | 0.001 | 0.001 | 1     | 371 | 0.002 | 0.994 | 0.001 | 0.002 | 0.001 | 2     |
| 132 | 0.996 | 0.001 | 0.001 | 0.001 | 0.001 | 1     | 372 | 0.002 | 0.986 | 0.002 | 0.004 | 0.005 | 2     |
| 133 | 0.995 | 0.002 | 0.001 | 0.001 | 0.002 | 1     | 373 | 0.002 | 0.993 | 0.002 | 0.002 | 0.002 | 2     |
| 134 | 0.973 | 0.003 | 0.009 | 0.007 | 0.008 | 1     | 374 | 0.007 | 0.980 | 0.002 | 0.009 | 0.002 | 2     |
| 135 | 0.997 | 0.001 | 0.001 | 0.001 | 0.001 | 1     | 375 | 0.002 | 0.994 | 0.001 | 0.002 | 0.001 | 2     |
| 136 | 0.996 | 0.001 | 0.001 | 0.001 | 0.001 | 1     | 376 | 0.002 | 0.991 | 0.003 | 0.001 | 0.002 | 2     |
| 137 | 0.996 | 0.001 | 0.001 | 0.001 | 0.001 | 1     | 377 | 0.003 | 0.993 | 0.002 | 0.001 | 0.001 | 2     |
| 138 | 0.997 | 0.001 | 0.001 | 0.001 | 0.001 | 1     | 378 | 0.006 | 0.987 | 0.002 | 0.003 | 0.002 | 2     |
| 139 | 0.996 | 0.001 | 0.001 | 0.001 | 0.001 | 1     | 379 | 0.006 | 0.983 | 0.004 | 0.004 | 0.003 | 2     |
| 140 | 0.997 | 0.001 | 0.001 | 0.001 | 0.001 | 1     | 380 | 0.003 | 0.991 | 0.002 | 0.001 | 0.002 | 2     |
| 141 | 0.996 | 0.002 | 0.001 | 0.001 | 0.001 | 1     | 381 | 0.004 | 0.988 | 0.002 | 0.003 | 0.002 | 2     |
| 142 | 0.994 | 0.002 | 0.001 | 0.001 | 0.001 | 1     | 382 | 0.003 | 0.994 | 0.001 | 0.001 | 0.001 | 2     |
| 143 | 0.997 | 0.001 | 0.001 | 0.001 | 0.001 | 1     | 383 | 0.004 | 0.991 | 0.002 | 0.002 | 0.002 | 2     |
| 144 | 0.996 | 0.001 | 0.001 | 0.001 | 0.001 | 1     | 384 | 0.003 | 0.991 | 0.001 | 0.003 | 0.002 | 2     |
| 145 | 0.990 | 0.001 | 0.001 | 0.002 | 0.005 | 1     | 385 | 0.004 | 0.991 | 0.002 | 0.001 | 0.002 | 2     |
| 146 | 0.995 | 0.001 | 0.001 | 0.001 | 0.001 | 1     | 386 | 0.002 | 0.990 | 0.004 | 0.001 | 0.003 | 2     |
| 147 | 0.997 | 0.001 | 0.001 | 0.001 | 0.001 | 1     | 387 | 0.002 | 0.993 | 0.002 | 0.001 | 0.002 | 2     |
| 148 | 0.997 | 0.001 | 0.001 | 0.001 | 0.001 | 1     | 388 | 0.002 | 0.990 | 0.002 | 0.003 | 0.003 | 2     |
| 149 | 0.990 | 0.002 | 0.004 | 0.001 | 0.004 | 1     | 389 | 0.005 | 0.987 | 0.003 | 0.002 | 0.003 | 2     |
| 150 | 0.994 | 0.001 | 0.002 | 0.001 | 0.001 | 1     | 390 | 0.003 | 0.990 | 0.003 | 0.001 | 0.002 | 2     |
| 151 | 0.997 | 0.001 | 0.001 | 0.001 | 0.001 | 1     | 391 | 0.003 | 0.994 | 0.001 | 0.001 | 0.001 | 2     |
| 152 | 0.996 | 0.001 | 0.001 | 0.001 | 0.001 | 1     | 392 | 0.002 | 0.993 | 0.002 | 0.001 | 0.002 | 2     |
| 153 | 0.996 | 0.001 | 0.001 | 0.001 | 0.001 | 1     | 393 | 0.004 | 0.983 | 0.002 | 0.002 | 0.009 | 2     |
| 154 | 0.995 | 0.001 | 0.002 | 0.001 | 0.001 | 1     | 394 | 0.003 | 0.993 | 0.001 | 0.001 | 0.001 | 2     |

| No. | Q1    | Q2    | Q3    | Q4    | Q5    | Group | No. | Q1    | Q2    | Q3    | Q4    | Q5    | Group |
|-----|-------|-------|-------|-------|-------|-------|-----|-------|-------|-------|-------|-------|-------|
| 155 | 0.996 | 0.001 | 0.001 | 0.001 | 0.001 | 1     | 395 | 0.001 | 0.991 | 0.004 | 0.002 | 0.002 | 2     |
| 156 | 0.996 | 0.001 | 0.001 | 0.001 | 0.001 | 1     | 396 | 0.001 | 0.991 | 0.003 | 0.002 | 0.004 | 2     |
| 157 | 0.997 | 0.001 | 0.001 | 0.001 | 0.001 | 1     | 397 | 0.002 | 0.993 | 0.002 | 0.001 | 0.002 | 2     |
| 158 | 0.993 | 0.002 | 0.002 | 0.001 | 0.002 | 1     | 398 | 0.002 | 0.992 | 0.002 | 0.001 | 0.003 | 2     |
| 159 | 0.996 | 0.001 | 0.001 | 0.001 | 0.001 | 1     | 399 | 0.003 | 0.992 | 0.002 | 0.001 | 0.002 | 2     |
| 160 | 0.995 | 0.001 | 0.002 | 0.001 | 0.001 | 1     | 400 | 0.003 | 0.991 | 0.002 | 0.001 | 0.002 | 2     |
| 161 | 0.997 | 0.001 | 0.001 | 0.001 | 0.001 | 1     | 401 | 0.008 | 0.971 | 0.011 | 0.001 | 0.009 | 2     |
| 162 | 0.995 | 0.001 | 0.001 | 0.002 | 0.001 | 1     | 402 | 0.003 | 0.986 | 0.004 | 0.002 | 0.005 | 2     |
| 163 | 0.996 | 0.001 | 0.001 | 0.001 | 0.001 | 1     | 403 | 0.002 | 0.993 | 0.002 | 0.003 | 0.001 | 2     |
| 164 | 0.997 | 0.001 | 0.001 | 0.001 | 0.001 | 1     | 404 | 0.002 | 0.987 | 0.004 | 0.004 | 0.004 | 2     |
| 165 | 0.998 | 0.001 | 0.001 | 0.001 | 0.001 | 1     | 405 | 0.003 | 0.992 | 0.002 | 0.002 | 0.002 | 2     |
| 166 | 0.996 | 0.001 | 0.001 | 0.001 | 0.001 | 1     | 406 | 0.002 | 0.994 | 0.001 | 0.001 | 0.001 | 2     |
| 167 | 0.996 | 0.001 | 0.001 | 0.001 | 0.001 | 1     | 407 | 0.002 | 0.992 | 0.001 | 0.003 | 0.001 | 2     |
| 168 | 0.996 | 0.001 | 0.001 | 0.001 | 0.001 | 1     | 408 | 0.002 | 0.995 | 0.001 | 0.002 | 0.001 | 2     |
| 169 | 0.994 | 0.002 | 0.001 | 0.001 | 0.001 | 1     | 409 | 0.003 | 0.991 | 0.002 | 0.001 | 0.002 | 2     |
| 170 | 0.996 | 0.001 | 0.001 | 0.001 | 0.001 | 1     | 410 | 0.008 | 0.981 | 0.007 | 0.001 | 0.003 | 2     |
| 171 | 0.995 | 0.001 | 0.002 | 0.001 | 0.001 | 1     | 411 | 0.002 | 0.995 | 0.001 | 0.001 | 0.001 | 2     |
| 172 | 0.990 | 0.001 | 0.004 | 0.001 | 0.004 | 1     | 412 | 0.003 | 0.993 | 0.001 | 0.001 | 0.001 | 2     |
| 173 | 0.997 | 0.001 | 0.001 | 0.001 | 0.001 | 1     | 413 | 0.002 | 0.995 | 0.001 | 0.001 | 0.001 | 2     |
| 174 | 0.995 | 0.001 | 0.002 | 0.001 | 0.001 | 1     | 414 | 0.002 | 0.991 | 0.001 | 0.005 | 0.001 | 2     |
| 175 | 0.997 | 0.001 | 0.001 | 0.001 | 0.001 | 1     | 415 | 0.008 | 0.986 | 0.001 | 0.004 | 0.002 | 2     |
| 176 | 0.996 | 0.001 | 0.002 | 0.001 | 0.001 | 1     | 416 | 0.002 | 0.994 | 0.001 | 0.001 | 0.001 | 2     |
| 177 | 0.995 | 0.002 | 0.001 | 0.001 | 0.001 | 1     | 417 | 0.003 | 0.993 | 0.001 | 0.002 | 0.001 | 2     |
| 178 | 0.997 | 0.001 | 0.001 | 0.001 | 0.001 | 1     | 418 | 0.003 | 0.994 | 0.001 | 0.001 | 0.001 | 2     |
| 179 | 0.996 | 0.001 | 0.001 | 0.001 | 0.001 | 1     | 419 | 0.004 | 0.993 | 0.002 | 0.001 | 0.001 | 2     |
| 180 | 0.997 | 0.001 | 0.001 | 0.001 | 0.001 | 1     | 420 | 0.003 | 0.994 | 0.001 | 0.002 | 0.001 | 2     |
| 181 | 0.994 | 0.002 | 0.001 | 0.002 | 0.001 | 1     | 421 | 0.004 | 0.969 | 0.001 | 0.023 | 0.003 | 2     |
| 182 | 0.996 | 0.001 | 0.001 | 0.001 | 0.001 | 1     | 422 | 0.002 | 0.994 | 0.001 | 0.001 | 0.002 | 2     |
| 183 | 0.996 | 0.001 | 0.001 | 0.001 | 0.001 | 1     | 423 | 0.002 | 0.994 | 0.001 | 0.001 | 0.001 | 2     |
| 184 | 0.997 | 0.001 | 0.001 | 0.001 | 0.001 | 1     | 424 | 0.005 | 0.991 | 0.001 | 0.001 | 0.001 | 2     |
| 185 | 0.995 | 0.001 | 0.002 | 0.001 | 0.001 | 1     | 425 | 0.002 | 0.995 | 0.001 | 0.002 | 0.001 | 2     |
| 186 | 0.997 | 0.001 | 0.001 | 0.001 | 0.001 | 1     | 426 | 0.004 | 0.987 | 0.003 | 0.002 | 0.004 | 2     |
| 187 | 0.996 | 0.001 | 0.001 | 0.001 | 0.001 | 1     | 427 | 0.005 | 0.991 | 0.001 | 0.002 | 0.001 | 2     |
| 188 | 0.996 | 0.001 | 0.002 | 0.001 | 0.001 | 1     | 428 | 0.005 | 0.988 | 0.001 | 0.005 | 0.001 | 2     |
| 189 | 0.995 | 0.002 | 0.001 | 0.001 | 0.001 | 1     | 429 | 0.003 | 0.994 | 0.001 | 0.001 | 0.001 | 2     |
| 190 | 0.997 | 0.001 | 0.001 | 0.001 | 0.001 | 1     | 430 | 0.005 | 0.991 | 0.001 | 0.002 | 0.001 | 2     |
| 191 | 0.997 | 0.001 | 0.001 | 0.001 | 0.001 | 1     | 431 | 0.004 | 0.989 | 0.002 | 0.002 | 0.003 | 2     |
| 192 | 0.996 | 0.001 | 0.001 | 0.001 | 0.001 | 1     | 432 | 0.002 | 0.996 | 0.001 | 0.001 | 0.001 | 2     |
| 193 | 0.002 | 0.001 | 0.003 | 0.001 | 0.993 | 5     | 433 | 0.003 | 0.994 | 0.001 | 0.001 | 0.001 | 2     |

| No. | Q1    | Q2    | Q3    | Q4    | Q5    | Group | No. | Q1    | Q2    | Q3    | Q4    | Q5    | Group |
|-----|-------|-------|-------|-------|-------|-------|-----|-------|-------|-------|-------|-------|-------|
| 194 | 0.001 | 0.001 | 0.004 | 0.001 | 0.993 | 5     | 434 | 0.003 | 0.992 | 0.002 | 0.002 | 0.002 | 2     |
| 195 | 0.001 | 0.001 | 0.004 | 0.001 | 0.993 | 5     | 435 | 0.004 | 0.993 | 0.001 | 0.001 | 0.001 | 2     |
| 196 | 0.001 | 0.001 | 0.004 | 0.000 | 0.994 | 5     | 436 | 0.009 | 0.983 | 0.004 | 0.002 | 0.001 | 2     |
| 197 | 0.001 | 0.001 | 0.023 | 0.001 | 0.974 | 5     | 437 | 0.001 | 0.996 | 0.001 | 0.001 | 0.001 | 2     |
| 198 | 0.001 | 0.001 | 0.003 | 0.005 | 0.989 | 5     | 438 | 0.001 | 0.994 | 0.001 | 0.002 | 0.001 | 2     |
| 199 | 0.001 | 0.001 | 0.003 | 0.000 | 0.995 | 5     | 439 | 0.003 | 0.992 | 0.002 | 0.001 | 0.002 | 2     |
| 200 | 0.001 | 0.001 | 0.004 | 0.001 | 0.994 | 5     | 440 | 0.003 | 0.992 | 0.002 | 0.002 | 0.002 | 2     |
| 201 | 0.001 | 0.001 | 0.004 | 0.001 | 0.994 | 5     | 441 | 0.003 | 0.988 | 0.005 | 0.002 | 0.002 | 2     |
| 202 | 0.001 | 0.001 | 0.007 | 0.000 | 0.991 | 5     | 442 | 0.002 | 0.994 | 0.001 | 0.001 | 0.001 | 2     |
| 203 | 0.001 | 0.001 | 0.002 | 0.001 | 0.996 | 5     | 443 | 0.002 | 0.995 | 0.001 | 0.001 | 0.001 | 2     |
| 204 | 0.001 | 0.001 | 0.003 | 0.001 | 0.994 | 5     | 444 | 0.004 | 0.992 | 0.001 | 0.002 | 0.002 | 2     |
| 205 | 0.001 | 0.001 | 0.003 | 0.001 | 0.995 | 5     | 445 | 0.004 | 0.988 | 0.003 | 0.002 | 0.003 | 2     |
| 206 | 0.001 | 0.001 | 0.006 | 0.001 | 0.991 | 5     | 446 | 0.001 | 0.993 | 0.002 | 0.002 | 0.002 | 2     |
| 207 | 0.001 | 0.001 | 0.013 | 0.019 | 0.966 | 5     | 447 | 0.005 | 0.991 | 0.002 | 0.001 | 0.001 | 2     |
| 208 | 0.001 | 0.001 | 0.002 | 0.001 | 0.995 | 5     | 448 | 0.007 | 0.980 | 0.008 | 0.003 | 0.002 | 2     |
| 209 | 0.002 | 0.001 | 0.005 | 0.001 | 0.991 | 5     | 449 | 0.003 | 0.993 | 0.002 | 0.001 | 0.001 | 2     |
| 210 | 0.001 | 0.001 | 0.003 | 0.001 | 0.994 | 5     | 450 | 0.003 | 0.992 | 0.002 | 0.001 | 0.001 | 2     |
| 211 | 0.001 | 0.001 | 0.002 | 0.001 | 0.995 | 5     | 451 | 0.002 | 0.995 | 0.001 | 0.001 | 0.001 | 2     |
| 212 | 0.001 | 0.001 | 0.006 | 0.001 | 0.992 | 5     | 452 | 0.003 | 0.993 | 0.001 | 0.001 | 0.001 | 2     |
| 213 | 0.001 | 0.000 | 0.001 | 0.001 | 0.997 | 5     | 453 | 0.004 | 0.992 | 0.002 | 0.002 | 0.001 | 2     |
| 214 | 0.001 | 0.001 | 0.004 | 0.001 | 0.994 | 5     | 454 | 0.003 | 0.993 | 0.001 | 0.002 | 0.001 | 2     |
| 215 | 0.001 | 0.001 | 0.003 | 0.001 | 0.995 | 5     | 455 | 0.003 | 0.994 | 0.001 | 0.001 | 0.001 | 2     |
| 216 | 0.001 | 0.001 | 0.002 | 0.000 | 0.996 | 5     | 456 | 0.002 | 0.994 | 0.001 | 0.002 | 0.001 | 2     |
| 217 | 0.002 | 0.001 | 0.020 | 0.001 | 0.977 | 5     | 457 | 0.005 | 0.991 | 0.001 | 0.002 | 0.001 | 2     |
| 218 | 0.001 | 0.001 | 0.002 | 0.002 | 0.995 | 5     | 458 | 0.003 | 0.990 | 0.002 | 0.003 | 0.002 | 2     |
| 219 | 0.001 | 0.001 | 0.004 | 0.001 | 0.993 | 5     | 459 | 0.003 | 0.993 | 0.001 | 0.001 | 0.001 | 2     |
| 220 | 0.001 | 0.000 | 0.002 | 0.001 | 0.996 | 5     | 460 | 0.002 | 0.994 | 0.001 | 0.001 | 0.001 | 2     |
| 221 | 0.001 | 0.002 | 0.018 | 0.001 | 0.978 | 5     | 461 | 0.004 | 0.988 | 0.002 | 0.004 | 0.002 | 2     |
| 222 | 0.001 | 0.001 | 0.003 | 0.000 | 0.996 | 5     | 462 | 0.001 | 0.995 | 0.001 | 0.001 | 0.002 | 2     |
| 223 | 0.001 | 0.001 | 0.002 | 0.000 | 0.996 | 5     | 463 | 0.002 | 0.989 | 0.002 | 0.001 | 0.005 | 2     |
| 224 | 0.002 | 0.001 | 0.013 | 0.001 | 0.984 | 5     | 464 | 0.002 | 0.993 | 0.001 | 0.003 | 0.001 | 2     |
| 225 | 0.001 | 0.001 | 0.008 | 0.001 | 0.990 | 5     | 465 | 0.002 | 0.992 | 0.003 | 0.001 | 0.002 | 2     |
| 226 | 0.001 | 0.001 | 0.002 | 0.000 | 0.996 | 5     | 466 | 0.005 | 0.905 | 0.003 | 0.085 | 0.002 | 2     |
| 227 | 0.002 | 0.001 | 0.054 | 0.001 | 0.942 | 5     | 467 | 0.001 | 0.991 | 0.002 | 0.002 | 0.003 | 2     |
| 228 | 0.001 | 0.001 | 0.009 | 0.001 | 0.989 | 5     | 468 | 0.004 | 0.984 | 0.003 | 0.002 | 0.007 | 2     |
| 229 | 0.002 | 0.001 | 0.002 | 0.001 | 0.995 | 5     | 469 | 0.004 | 0.981 | 0.004 | 0.008 | 0.004 | 2     |
| 230 | 0.001 | 0.001 | 0.003 | 0.001 | 0.995 | 5     | 470 | 0.002 | 0.987 | 0.003 | 0.003 | 0.004 | 2     |
| 231 | 0.001 | 0.001 | 0.003 | 0.000 | 0.994 | 5     | 471 | 0.003 | 0.982 | 0.002 | 0.010 | 0.003 | 2     |
| 232 | 0.001 | 0.001 | 0.005 | 0.001 | 0.992 | 5     | 472 | 0.002 | 0.994 | 0.002 | 0.001 | 0.001 | 2     |

| No. | Q1    | Q2    | Q3    | Q4    | Q5    | Group | No. | Q1    | Q2    | Q3    | Q4    | Q5    | Group |
|-----|-------|-------|-------|-------|-------|-------|-----|-------|-------|-------|-------|-------|-------|
| 233 | 0.001 | 0.001 | 0.043 | 0.001 | 0.955 | 5     | 473 | 0.001 | 0.995 | 0.001 | 0.001 | 0.001 | 2     |
| 234 | 0.001 | 0.001 | 0.005 | 0.001 | 0.992 | 5     | 474 | 0.004 | 0.989 | 0.001 | 0.004 | 0.002 | 2     |
| 235 | 0.001 | 0.001 | 0.010 | 0.001 | 0.988 | 5     | 475 | 0.003 | 0.979 | 0.003 | 0.007 | 0.007 | 2     |
| 236 | 0.001 | 0.001 | 0.005 | 0.001 | 0.993 | 5     | 476 | 0.002 | 0.992 | 0.002 | 0.001 | 0.003 | 2     |
| 237 | 0.001 | 0.001 | 0.004 | 0.001 | 0.995 | 5     | 477 | 0.001 | 0.995 | 0.001 | 0.001 | 0.001 | 2     |
| 238 | 0.001 | 0.001 | 0.005 | 0.001 | 0.992 | 5     | 478 | 0.006 | 0.932 | 0.009 | 0.049 | 0.003 | 2     |
| 239 | 0.001 | 0.001 | 0.003 | 0.001 | 0.995 | 5     | 479 | 0.002 | 0.995 | 0.001 | 0.001 | 0.001 | 2     |
| 240 | 0.001 | 0.001 | 0.005 | 0.001 | 0.993 | 5     | 480 | 0.002 | 0.993 | 0.001 | 0.002 | 0.001 | 2     |
