# Supplementary material for: Association Analysis of Tiller-Related Traits with EST-SSR Markers in Psathyrostachys juncea
Source: MDPI journal article supplement (doi:10.3390/genes14101970), 2023-10-21
Supplement: s1 [file s1]

**Table S2** Genetic diversity analysis using SSR markers of *P. juncea*

| Primer  | Na    | Ne    | <i>I</i> | <i>H</i> <sub>0</sub> | <i>He</i> | PIC   | Primer        | Na    | Ne    | <i>I</i> | <i>H</i> <sub>0</sub> | <i>He</i> | PIC   |
|---------|-------|-------|----------|-----------------------|-----------|-------|---------------|-------|-------|----------|-----------------------|-----------|-------|
| 81      | 2.000 | 1.997 | 0.692    | 0.876                 | 0.499     | 0.375 | 94279         | 2.000 | 1.994 | 0.692    | 0.480                 | 0.499     | 0.374 |
| 516     | 1.500 | 1.117 | 0.169    | 0.103                 | 0.095     | 0.272 | 99009         | 2.000 | 1.475 | 0.503    | 0.317                 | 0.322     | 0.372 |
| 2249    | 2.000 | 2.000 | 0.693    | 0.455                 | 0.500     | 0.375 | 114416        | 2.000 | 1.548 | 0.539    | 0.420                 | 0.354     | 0.291 |
| 002947A | 2.000 | 1.994 | 0.692    | 0.586                 | 0.499     | 0.374 | 120572        | 2.000 | 1.687 | 0.588    | 0.170                 | 0.401     | 0.318 |
| 4435    | 2.000 | 1.532 | 0.531    | 0.291                 | 0.347     | 0.324 | 126480        | 2.000 | 1.996 | 0.692    | 0.067                 | 0.499     | 0.374 |
| 6022    | 2.000 | 1.425 | 0.474    | 0.325                 | 0.298     | 0.253 | 127259        | 2.000 | 1.954 | 0.681    | 0.735                 | 0.488     | 0.369 |
| 006181A | 2.000 | 1.871 | 0.658    | 0.228                 | 0.466     | 0.362 | 128934        | 2.000 | 1.652 | 0.578    | 0.463                 | 0.390     | 0.313 |
| 8649    | 2.000 | 1.792 | 0.633    | 0.404                 | 0.441     | 0.343 | 132067        | 2.000 | 1.395 | 0.441    | 0.326                 | 0.274     | 0.233 |
| 13109   | 2.000 | 1.721 | 0.606    | 0.255                 | 0.416     | 0.326 | 132162        | 1.500 | 1.458 | 0.335    | 0.210                 | 0.239     | 0.182 |
| 13558   | 1.333 | 1.030 | 0.059    | 0.028                 | 0.027     | 0.026 | 133160        | 2.000 | 2.000 | 0.693    | 0.800                 | 0.400     | 0.375 |
| 016533C | 1.500 | 1.177 | 0.215    | 0.122                 | 0.131     | 0.114 | 134436        | 2.000 | 1.901 | 0.666    | 0.336                 | 0.473     | 0.361 |
| 18679   | 2.000 | 1.904 | 0.667    | 0.530                 | 0.474     | 0.361 | 135127        | 2.000 | 1.734 | 0.614    | 0.577                 | 0.423     | 0.366 |
| 019368C | 2.000 | 1.818 | 0.638    | 0.603                 | 0.446     | 0.346 | 137131        | 2.000 | 1.592 | 0.496    | 0.208                 | 0.330     | 0.262 |
| 022073A | 2.000 | 1.991 | 0.691    | 0.681                 | 0.498     | 0.373 | 138171        | 2.000 | 1.480 | 0.502    | 0.248                 | 0.322     | 0.270 |
| 22271   | 2.000 | 1.527 | 0.527    | 0.430                 | 0.344     | 0.284 | 139768A       | 2.000 | 1.250 | 0.350    | 0.220                 | 0.199     | 0.179 |
| 024537A | 2.000 | 1.442 | 0.442    | 0.211                 | 0.281     | 0.232 | 139898        | 2.000 | 1.676 | 0.593    | 0.545                 | 0.403     | 0.322 |
| 25029   | 2.000 | 1.494 | 0.457    | 0.403                 | 0.297     | 0.237 | 139974        | 1.500 | 1.328 | 0.293    | 0.272                 | 0.198     | 0.159 |
| 26249   | 2.000 | 2.000 | 0.693    | 0.426                 | 0.500     | 0.375 | 140425        | 2.000 | 1.591 | 0.546    | 0.258                 | 0.363     | 0.181 |
| 26620   | 2.000 | 1.732 | 0.592    | 0.293                 | 0.407     | 0.319 | 141012        | 2.000 | 1.133 | 0.249    | 0.140                 | 0.130     | 0.121 |
| 27806   | 2.000 | 1.886 | 0.663    | 0.625                 | 0.470     | 0.360 | 141141        | 2.000 | 1.178 | 0.284    | 0.165                 | 0.151     | 0.140 |
| 028161A | 2.000 | 1.999 | 0.693    | 0.419                 | 0.500     | 0.375 | 142295B       | 2.000 | 1.263 | 0.256    | 0.221                 | 0.178     | 0.160 |
| 28324   | 2.000 | 1.336 | 0.383    | 0.104                 | 0.233     | 0.201 | 142346        | 2.000 | 1.454 | 0.491    | 0.135                 | 0.312     | 0.263 |
| 28410   | 2.000 | 1.999 | 0.693    | 0.113                 | 0.500     | 0.375 | 142484        | 2.000 | 1.582 | 0.542    | 0.314                 | 0.359     | 0.292 |
| 28553   | 2.000 | 1.725 | 0.611    | 0.578                 | 0.420     | 0.334 | 142585        | 2.000 | 1.602 | 0.563    | 0.211                 | 0.376     | 0.305 |
| 029223A | 2.000 | 1.984 | 0.689    | 0.766                 | 0.496     | 0.373 | 142612A       | 2.000 | 1.558 | 0.544    | 0.392                 | 0.358     | 0.294 |
| 029223B | 2.000 | 1.974 | 0.687    | 0.529                 | 0.493     | 0.372 | 143409        | 2.000 | 1.688 | 0.598    | 0.301                 | 0.408     | 0.324 |
| 29697   | 2.000 | 1.639 | 0.536    | 0.392                 | 0.360     | 0.286 | 144127        | 2.000 | 1.149 | 0.253    | 0.140                 | 0.130     | 0.121 |
| 030766B | 2.000 | 1.173 | 0.279    | 0.136                 | 0.148     | 0.137 | 144827        | 2.000 | 1.773 | 0.627    | 0.366                 | 0.435     | 0.340 |
| 35661   | 2.000 | 1.227 | 0.328    | 0.081                 | 0.183     | 0.166 | 144926B       | 2.000 | 1.803 | 0.631    | 0.286                 | 0.440     | 0.342 |
| 37119   | 2.000 | 1.836 | 0.644    | 0.459                 | 0.452     | 0.349 | 146991        | 2.000 | 1.769 | 0.623    | 0.537                 | 0.432     | 0.338 |
| 37353   | 1.500 | 1.500 | 0.347    | 0.125                 | 0.250     | 0.188 | 149977        | 2.000 | 1.923 | 0.672    | 0.361                 | 0.479     | 0.364 |
| 38976   | 2.000 | 1.366 | 0.314    | 0.303                 | 0.213     | 0.168 | 163142        | 2.000 | 1.819 | 0.642    | 0.278                 | 0.450     | 0.349 |
| 40957   | 2.000 | 1.866 | 0.657    | 0.449                 | 0.464     | 0.356 | 163639        | 2.000 | 1.711 | 0.594    | 0.596                 | 0.406     | 0.321 |
| 43242   | 2.000 | 1.772 | 0.627    | 0.642                 | 0.436     | 0.341 | 165982        | 2.000 | 1.771 | 0.627    | 0.577                 | 0.435     | 0.341 |
| 043637B | 1.500 | 1.499 | 0.346    | 0.244                 | 0.250     | 0.187 | 167041        | 2.000 | 1.733 | 0.608    | 0.191                 | 0.419     | 0.330 |
| 44262   | 2.000 | 1.787 | 0.626    | 0.631                 | 0.435     | 0.339 | 185875        | 2.000 | 1.909 | 0.669    | 0.599                 | 0.476     | 0.363 |
| 45589   | 2.000 | 1.688 | 0.582    | 0.450                 | 0.396     | 0.314 | 193064B       | 2.000 | 1.924 | 0.673    | 0.330                 | 0.480     | 0.365 |
| 045600A | 2.000 | 1.263 | 0.363    | 0.132                 | 0.208     | 0.187 | 194430        | 1.500 | 1.349 | 0.301    | 0.094                 | 0.206     | 0.163 |
| 046829B | 2.000 | 1.984 | 0.689    | 0.204                 | 0.496     | 0.373 | 194938        | 2.000 | 1.550 | 0.444    | 0.312                 | 0.296     | 0.232 |
| 51628   | 2.000 | 1.570 | 0.499    | 0.331                 | 0.330     | 0.264 | <i>OsIPT4</i> | 2.000 | 1.579 | 0.518    | 0.257                 | 0.343     | 0.276 |
| 058749A | 2.000 | 1.825 | 0.642    | 0.517                 | 0.450     | 0.348 | <i>OsIPT5</i> | 2.000 | 1.585 | 0.556    | 0.214                 | 0.369     | 0.301 |

| Primer  | Na    | Ne    | <i>I</i> | <i>H</i> <sub>0</sub> | <i>He</i> | PIC   | Primer          | Na    | Ne    | <i>I</i> | <i>H</i> <sub>0</sub> | <i>He</i> | PIC   |
|---------|-------|-------|----------|-----------------------|-----------|-------|-----------------|-------|-------|----------|-----------------------|-----------|-------|
| 60437   | 2.000 | 1.197 | 0.304    | 0.181                 | 0.165     | 0.151 | <i>OsIPT7</i>   | 2.000 | 1.987 | 0.690    | 0.851                 | 0.497     | 0.373 |
| 61356   | 2.000 | 1.670 | 0.590    | 0.235                 | 0.401     | 0.320 | <i>OsIPT8</i>   | 2.000 | 1.596 | 0.561    | 0.200                 | 0.373     | 0.304 |
| 63559   | 1.500 | 1.500 | 0.346    | 0.254                 | 0.250     | 0.187 | <i>OsCKX1</i>   | 2.000 | 1.738 | 0.616    | 0.463                 | 0.425     | 0.335 |
| 64748   | 2.000 | 1.520 | 0.526    | 0.324                 | 0.342     | 0.284 | <i>OsCKX4</i>   | 2.000 | 1.832 | 0.647    | 0.431                 | 0.454     | 0.351 |
| 65010   | 2.000 | 1.942 | 0.678    | 0.254                 | 0.485     | 0.367 | <i>OsCKX5</i>   | 2.000 | 1.468 | 0.490    | 0.347                 | 0.313     | 0.262 |
| 65544   | 2.000 | 1.457 | 0.493    | 0.144                 | 0.314     | 0.264 | <i>OsCKX9</i>   | 2.000 | 1.806 | 0.630    | 0.548                 | 0.440     | 0.341 |
| 66628   | 2.000 | 1.784 | 0.621    | 0.252                 | 0.431     | 0.336 | <i>OsYUCCA4</i> | 2.000 | 1.191 | 0.298    | 0.176                 | 0.160     | 0.148 |
| 66842   | 2.000 | 1.971 | 0.686    | 0.291                 | 0.493     | 0.371 | <i>OsYUCCA6</i> | 2.000 | 1.786 | 0.622    | 0.203                 | 0.433     | 0.337 |
| 67939   | 2.000 | 1.794 | 0.625    | 0.213                 | 0.435     | 0.338 | <i>OsRR6</i>    | 2.000 | 1.990 | 0.691    | 0.716                 | 0.497     | 0.374 |
| 68444   | 1.500 | 1.496 | 0.346    | 0.339                 | 0.249     | 0.187 | <i>OsRR7</i>    | 2.000 | 1.628 | 0.574    | 0.014                 | 0.386     | 0.311 |
| 69862   | 2.000 | 1.969 | 0.685    | 0.499                 | 0.492     | 0.371 | <i>OsRR11</i>   | 2.000 | 1.945 | 0.679    | 0.750                 | 0.486     | 0.368 |
| 70047   | 1.667 | 1.663 | 0.461    | 0.270                 | 0.332     | 0.249 | <i>OsTB1</i>    | 2.000 | 1.996 | 0.692    | 0.246                 | 0.499     | 0.374 |
| 70343   | 2.000 | 1.789 | 0.633    | 0.353                 | 0.441     | 0.344 | <i>D3</i>       | 2.000 | 1.808 | 0.631    | 0.626                 | 0.441     | 0.342 |
| 71974   | 2.000 | 1.607 | 0.507    | 0.382                 | 0.338     | 0.268 | <i>D14</i>      | 2.000 | 1.696 | 0.598    | 0.363                 | 0.408     | 0.324 |
| 72525   | 2.000 | 1.833 | 0.644    | 0.699                 | 0.452     | 0.349 | <i>OsD3</i>     | 2.000 | 1.647 | 0.581    | 0.397                 | 0.392     | 0.315 |
| 072655A | 2.000 | 1.660 | 0.560    | 0.179                 | 0.379     | 0.301 | <i>OsD10</i>    | 2.000 | 1.815 | 0.636    | 0.166                 | 0.445     | 0.345 |
| 73069   | 2.000 | 1.980 | 0.688    | 0.265                 | 0.495     | 0.372 | <i>OsD27</i>    | 2.000 | 2.000 | 0.693    | 0.800                 | 0.400     | 0.375 |
| 73311   | 2.000 | 1.970 | 0.686    | 0.560                 | 0.492     | 0.371 | <i>OsD17</i>    | 2.000 | 1.948 | 0.679    | 0.355                 | 0.486     | 0.368 |
| 073848A | 2.000 | 1.937 | 0.677    | 0.303                 | 0.484     | 0.367 | <i>OsMADS57</i> | 2.000 | 1.629 | 0.574    | 0.336                 | 0.386     | 0.311 |
| 074428A | 2.000 | 1.673 | 0.583    | 0.445                 | 0.395     | 0.315 | <i>OsPIN1a</i>  | 2.000 | 1.708 | 0.605    | 0.333                 | 0.414     | 0.329 |
| 74564   | 2.000 | 1.918 | 0.671    | 0.239                 | 0.478     | 0.364 | <i>OsPIN2</i>   | 2.000 | 1.982 | 0.688    | 0.076                 | 0.495     | 0.373 |
| 075415B | 2.000 | 1.982 | 0.689    | 0.301                 | 0.496     | 0.373 | <i>OsPIN9</i>   | 2.000 | 1.924 | 0.672    | 0.263                 | 0.479     | 0.364 |
| 075587A | 2.000 | 1.202 | 0.309    | 0.045                 | 0.168     | 0.154 | Mean            | 1.957 | 1.682 | 0.554    | 0.353                 | 0.379     | 0.300 |

Na, Observed number of alleles; Ne, Effective number of alleles; *I*, Shannon's information index; *H*<sub>0</sub>, observed heterozygosity; *He*, expected heterozygosity; PIC, Polymorphic information content
