# Supplementary material for: Association Analysis of Tiller-Related Traits with EST-SSR Markers in Psathyrostachys juncea
Source: MDPI journal article supplement (doi:10.3390/genes14101970), 2023-10-21
Supplement: s1 [file s1]

**Table S1** SSR primer information

| Primer  | Upstream primer       | Downstream primer     | Annealing temperature<br>(°C) |
|---------|-----------------------|-----------------------|-------------------------------|
| 000081  | TCACTGCCTCTGCATCAATC  | CCTCGGAGAAGCATGTGAAT  | 55.0                          |
| 000516  | CCAACGTCCATCCTTGAAGT  | ACGGTTTGAAGTGTGTTTGCC | 54.5                          |
| 002249  | GCGCACAGAGTTAATGGTGA  | GTGAAGGGAAGAAGTGCCC   | 56.0                          |
| 002947A | ATCCTCCAACCTCCCAGTCC  | AAGCAAGGGGAGAAGAGACC  | 57.0                          |
| 004435  | ATCTCGCCTCCTCTCTCCTC  | GTTTCCACCTCCTCCTCCAC  | 58.3                          |
| 006022  | TTCCCAAACGGATCAAGTTC  | AAAATTTGAGGCAAGCGTGA  | 52.5                          |
| 006181A | CCTTTTCCGTGCATACTGGT  | CTGCGAGGGAATGATGGTAT  | 55.0                          |
| 008649  | GGCACTTATGACACCCCAAG  | GGCGTGTGTATGCGAGTATG  | 56.4                          |
| 013109  | TCCTTCGGGATCCCTCTACT  | ATGGTAGGGTTGGCTCTGTG  | 57.0                          |
| 013558  | ACTAGCGAAGCCCTGTCAAA  | TCCCTAACTTCCTTCCCGTT  | 56.0                          |
| 016533C | TAGGTCAAGCCCAAGTTGCT  | TCTTTACCGTCACCTCAGCC  | 57.0                          |
| 018679  | GCGACGGGAAGAAGAACTC   | GGGTAGCCATGAGCACAAAG  | 56.5                          |
| 019368C | TGGATTGTTCTAGCTGCGTG  | ACCTGTGTCTGTCCATTCCA  | 55.5                          |
| 022073A | CTGTCCCATCTCCCCTGTAA  | CACTAGGAGGTCGGGCATAA  | 56.4                          |
| 022271  | GGTTCTTCCTTCCTTCCTCG  | AGGGTAAGGGCCAGGTTTTA  | 55.5                          |
| 024537A | AACAGCCTCTGTTTGCTCGT  | CCACCTCGTCCAGTCATTCT  | 57.0                          |
| 025029  | ACTGATATAACCCGGTCGCTG | GGCCGGAGATTAGGCTTTAC  | 56.5                          |
| 026249  | CTGACCTGCATTCAAGAGCCT | AGTACAGCATCCCGACCAAC  | 57.5                          |
| 026620  | CAACCTGTTGGGTTGGTAGG  | CTCCCCAAGAAGCACGTATG  | 56.0                          |
| 027806  | GCAGTGTACATTTGCGCAGT  | AACACTGACATGTGCAAGCC  | 56.3                          |
| 028161A | GCCCTACCTTAGCCCCCTTT  | GGCTCACTCACGATGGAGAT  | 57.0                          |
| 028324  | ATGAAGAGAATTTGCGGGTG  | AATTTTGTAGGCGAGACGGA  | 53.2                          |
| 028410  | AAATGGAGAGGGGTTGTGTG  | CACGCAGACATTGGAGTCAT  | 55.0                          |
| 028553  | TTGACAAATCAGTCAGGCCA  | ACACCGAGAAATCCCATCAC  | 54.5                          |
| 029223A | GTCGTGATCCCTGGTCATGT  | ACGACTTCTTCTCGCAGCAT  | 57.0                          |
| 029223B | TGGTACATGTGTCCACCACC  | AAGAGCATCCTCGACAGCAC  | 57.5                          |
| 029697  | AGGCACAACCTTGCTGCATAA | GCCACAACCCCATTAACAAC  | 54.7                          |
| 030766B | CTCTTGTTGGCCCGGTATAAA | GGCATACCTGCTTGACGAAT  | 55.0                          |
| 035661  | TACGCACCATCACCACTTGT  | CGACGACGACTACGAGTTCA  | 56.6                          |
| 037119  | CGCTTTATACTCCCGCAGTC  | CATCGTAGGTGCACAACACC  | 56.3                          |
| 037353  | GAAGCTCTGGTTGTTGGAGG  | AGCCTTCTTCTTCCTCCTGG  | 56.5                          |
| 038976  | GTTTAGGCGGGAGAGAAACC  | CACCATCTCCCACAGCCTAT  | 56.5                          |
| 040957  | TGTTACGCCCCCAAAGTTAG  | CGCCATAGCTTCAGTCAACA  | 55.0                          |
| 043242  | CGTGATGAAAACGCGTAAGA  | GATGTTTCATGGCAGCCTTTT | 53.2                          |
| 043637B | GTGTGGCGATTTCATGTTGAC | CAGAACGAAGATGTGCTCCA  | 54.7                          |
| 044262  | TACGACTTCCTCGAACACCC  | GTCCAGTCGTCGATCTCCTC  | 57.2                          |
| 045589  | GACAGATTTGACTGGGAGCC  | AAGGAACTCTTGAGTCCGCA  | 56.0                          |
| 045600A | TCTCGTAGACCGCCTTGAAT  | GCCACCATAGCTTGCTTCTC  | 56.0                          |
| 046829B | GATCATGGGGAAGCGCAC    | AACAACGACTCTCACCCACC  | 57.2                          |
| 051628  | CTTAAGTTGCATGTCCCCGT  | TGGTCCATTCTCTTGGGAAG  | 54.7                          |

| Primer  | Upstream primer       | Downstream primer     | Annealing temperature<br>(°C) |
|---------|-----------------------|-----------------------|-------------------------------|
| 058749A | CCTCGTAGAAGACGTAGGCG  | GACTTCAAGGCGCTGGTG    | 57.5                          |
| 060437  | GAAGAACAGGGACTGGACGA  | TGGGGAAGAGTCTCACTTGG  | 56.6                          |
| 061356  | GTGTGCTACGCTTGGGTGT   | CGTCCTCACTCTGTGGCTC   | 58.5                          |
| 063559  | ACATTTCCAGCCACATCCAC  | AAGCCTTGTCCTGTGTTG    | 55.6                          |
| 064748  | GCCTGAAATCCAAGCACATT  | CCCTGTTTAATCGGCTACCA  | 54.0                          |
| 065010  | GAACAGACGAAACCGCCC    | TGGTGAGACTCTGCTCATGG  | 57.0                          |
| 065544  | GAGGGCGAGCCAAATAATC   | ATGCTTCATTTGTTAGCGGG  | 53.4                          |
| 066628  | TGTGTTGGCCCGAACTAATA  | TTCAATACAAGCCATTCAAGG | 53.4                          |
| 066842  | AAGGTAGGGCCATTGTACCC  | CTGGGTCATGAACGACTCCT  | 57.0                          |
| 067939  | GATCGGATTGTTGCTAGCCT  | CCTTCCACTTCTTCTCGCAG  | 55.4                          |
| 068444  | CGAAGTCAAAAGCGAACACA  | AATCATGGATCCCACCTGAA  | 53.1                          |
| 069862  | GGAGGTGGATCTACCGGG    | GTGGGAGAAGACGACCATGT  | 57.5                          |
| 070047  | GTAAGCGGCAACCTCAGAAC  | AACGTCTTATCCTCCTGCCC  | 56.8                          |
| 070343  | TTCTCTCACTGCACCCATTG  | GCACCTTGCAATTGCTGTCTA | 55.4                          |
| 071974  | CTTGGCCTTGACGACCTTAG  | GAAGTATGCCGACCTGAAGC  | 56.0                          |
| 072525  | ATCTTGCTCGAACGAACCAC  | TGAAACCCCTTCTTCCTCCT  | 55.5                          |
| 072655A | TGTGGTACTACGCCTTGCTG  | GACAGTAGAGCCAGCTTCCG  | 58.0                          |
| 073069  | AAACAAACTGTCCCTCACCG  | CTTTCTGGCTCAGCACTTCC  | 55.8                          |
| 073311  | CACCCACCATAGCGAGTTG   | GGGAAGTTGCTCTTCAGCAC  | 56.5                          |
| 073848A | TGGATACAATCCGTCTGCAA  | GTATCACGGGCCAATTCATC  | 53.5                          |
| 074428A | TGGACAGCGATCTTTCACAG  | GCCTCGTTGTCCAGATTGTT  | 55.2                          |
| 074564  | TCGGCTTCCTCTTCCTATCA  | CAGGAGCTCCAAACCACTTT  | 55.0                          |
| 075415B | CCTCTCCACCCTGTCTGTTT  | CTCTCTTCTTCGACCGTCCC  | 57.7                          |
| 075587A | GGTCAAGAATGGAGACTCGC  | TCCTCTTCATTGAGGTCGCT  | 55.8                          |
| 094279  | AGACACGAGCAGTGCAGCTA  | CTGCCCAGCTGTAAGCAGT   | 58.5                          |
| 099009  | TTGTCTGTTCTGGGGTCCTC  | AGCAGAACCGATGACTTTGC  | 56.5                          |
| 114416  | GACGAGCCTGATATGTGCAA  | CTTTATAGCCGTCCGGTGAC  | 55.5                          |
| 120572  | ACAAAGACGCCAATCCTGAC  | CATCTGGATCCACTCGTCCT  | 56.0                          |
| 126480  | CACCACAGGAGATGCTGCTA  | GGCGAGTCTGTTTTGGAGAC  | 56.8                          |
| 127259  | TCCTTCGGGATCCTACCTTT  | GCTTGTGTTGATGCCTCTGA  | 55.2                          |
| 128934  | TTCGAAAGAGGAATTTTGCG  | ACCAACCAAATCCAAATCCA  | 51.1                          |
| 132067  | TAAAAGAGGCATTGGTTGCC  | ATGTTGCCGACATAGCATCA  | 53.5                          |
| 132162  | GTTGGCCACATTCCCTAAGA  | TCAACGTTGCAGGTTACAGC  | 55.3                          |
| 133160  | AGTTCTTCAGCTCGACCCAA  | GGTCCTTGAGGGTGAAGTTG  | 56.0                          |
| 134436  | TCTTTCTCTCCACACCCAGC  | TGAGCTAGGACTCGCCAGAT  | 57.5                          |
| 135127  | CCGCAGTTGACATTCTCCTT  | TATCCTTGGGGACTGGAACA  | 55.2                          |
| 137131  | GTTGTCGAGCCGGAACCTCT  | TATCCACACTGTCGAGCTGC  | 57.5                          |
| 138171  | ATTC AACGCTGTAGCCCATC | GGTATTCTGCCTTTGGGTGA  | 55.0                          |
| 139768A | TCCGACATGTCATCCTTTGA  | TTTCTGTCAACATCTGCATGG | 53.1                          |
| 139898  | TCTCTGCTGTCTTCCCTGT   | GTCAAAGCAGAGAGCAGCCT  | 58.0                          |
| 139974  | GGTAGCAAAGTTTCCCATGC  | AACAGCAATGAGCTCCGTTT  | 54.7                          |
| 140425  | GCATGCTATGGGCACAACATA | CTGGTCTGCACTATGCCAAA  | 55.3                          |

| Primer          | Upstream primer           | Downstream primer         | Annealing temperature<br>(°C) |
|-----------------|---------------------------|---------------------------|-------------------------------|
| 141012          | CTTCTTCTCCTCCTGATGCG      | GGAGATCCTTCAAGTGCGAG      | 55.6                          |
| 141141          | AATTTCTTGGCGTGTTCCAC      | CCAAATCGAATTGCTGTCCT      | 52.8                          |
| 142295B         | GGAACGAGGAGGAGGAAGAC      | GTATCTGAAGTCGGCGTCGT      | 57.4                          |
| 142346          | TTTCAGCTCGACCTCTTCGT      | GAGATGGGTGAGGAGGAACA      | 56.3                          |
| 142484          | CCAACGTGTCTAGCTCCCTC      | ACGTCACCCAGCTTGAGACT      | 58.5                          |
| 142585          | CTCCTGCTTTCTCGCTCG        | GAACGTGTCCCAGATGGTCT      | 56.8                          |
| 142612A         | GTTGCACAAGAACGCAAAGA      | TCTTCATCCCCTTTGTCAGG      | 54.0                          |
| 143409          | GAAGAACCTTGCTGAGCGTC      | GCTCGGTTATCTGCCTCTTG      | 56.3                          |
| 144127          | GAGCATGGTGGTGCAGATAA      | GGATGCATGTTAGGGCTGTT      | 55.3                          |
| 144827          | AGTCTTCTTCTCCCCTTGC       | CATCTTCTGCAGCAGTCCCT      | 57.4                          |
| 144926B         | TGGTGAGTTTACTCCCCAC       | ACCAGAATGCTGCTGCTCTT      | 57.0                          |
| 146991          | GGATGTAGGAGACCGCCAT       | ACGAAGACGAAGGCTGGAT       | 56.8                          |
| 149977          | GATGATGACTGGATCACCCC      | ACGCAGAGGAGGAAACTCAA      | 55.3                          |
| 163142          | TAGCAATTTGGGAAGGCATC      | TCATTTTGGAGCAGGGTTC       | 52.8                          |
| 163639          | GTATGGGGTGGCTTTCCTG       | GTTGCTCCAACCTTTGAGCC      | 56.3                          |
| 165982          | ACGACCAGCACGTTCCTTCTT     | CCACTCATCACTCCCTCCTC      | 57.0                          |
| 167041          | GACCCTCAAGTTGCAATGGT      | CCGCAAAGATGACACAGAGA      | 55.2                          |
| 185875          | GCCTGTAGTCTCGTCTTGGC      | TACCTCTTCTGCTGCCACCT      | 58.5                          |
| 193064B         | GCATCGATGACGACAGGAG       | GATCTGGTGTCTTCGGTGA       | 56.3                          |
| 194430          | GTCGTGGCGTCTACCCATAG      | GAACGACGCACACTGGTTC       | 57.7                          |
| 194938          | GTTCCTCATTTGGGCGAGTA      | GCACGGCATCTTTAGCTTC       | 54.6                          |
| <i>OsIPT4</i>   | TGGATGTGGTGACGAACAAGGTGAC | GATCTACGTCGACCCAGAGGAAGCA | 62.0                          |
| <i>OsIPT5</i>   | AGGTGATCAACGCCGACAAGCTGCA | TCGACGAGCTCCTCGATGTAGGAGT | 63.5                          |
| <i>OsIPT7</i>   | TGGACGACATGGTGGACGCTGGCAT | GCTTTGATGTCGTCGATCGCCTCGG | 65.0                          |
| <i>OsIPT8</i>   | GTCGACGACGATGTTCTCGACGAAT | TGTTGGCCTTGATCTCGTCTATCGC | 61.0                          |
| <i>OsCKX1</i>   | ACAAGGCGTACCTGGCGCAC      | TGGCCAGGGGAGAGCAGCTT      | 64.5                          |
| <i>OsCKX4</i>   | GCCACAGGACCCAGTGCAGG      | TTCAGCCACGGGTGTGGGACT     | 64.5                          |
| <i>OsCKX5</i>   | CGCTGCTGGGCGAGCTGAAT      | CGCCTTGTCACGCGGTCTA       | 64.4                          |
| <i>OsCKX9</i>   | GCCAGGATTCTCTTGAACCTGC    | ACGCACTGGGTCCTGCGGAT      | 61.0                          |
| <i>OsYUCCA4</i> | GCAGAATGGCCTGTACGCTGTTGG  | CAGACCAGCACATGACGTGTCTAC  | 63.5                          |
| <i>OsYUCCA6</i> | CCATTCCCAGATGGTTGGAAGG    | CATGTTGCGCCTCAAGATATTTG   | 57.5                          |
| <i>OsRR6</i>    | CCGAGGACTTCTGTCTCA        | TCATCCTCTCCATGATCCAA      | 53.5                          |
| <i>OsRR7</i>    | TGCTCAAGAAGATCAAGGAATCG   | GGCACGTTCTCTGACGACATTAT   | 56.0                          |
| <i>OsRR11</i>   | CTAGGCTCGGAACCAAATGT      | ACGGGGATCTTCTTCAGCTT      | 56.0                          |
| <i>OsTB1</i>    | GCCGGATGCAAGAAATC         | TCAGCAGTAGTGCCGCGAA       | 55.5                          |
| <i>D3</i>       | GCAGTTGCGGGAGGACTATT      | CACGCCATCCCATTGTGCAC      | 57.4                          |
| <i>D14</i>      | TCTCCCCGGTTCTTGAACGA      | CGTCGAACACCTGCTGTATCT     | 58.5                          |
| <i>OsD3</i>     | TTCGGCCTACTCTCAAGGAA      | CACAGCTTCACTGAGGTCCA      | 56.5                          |
| <i>OsD10</i>    | GGTAGCAACGAGAGGCAGTT      | TCGACCTTGGTGAGCGTGTT      | 59.0                          |
| <i>OsD27</i>    | TCTGGGCTAAAGAATGAAAAGGA   | AGAGCTTGGGTCACAATCTCG     | 55.5                          |
| <i>OsD17</i>    | ACCTCGTCCAGAAGCGTGAGT     | AGGCCCAGTCGTGGATCA        | 59.5                          |
| <i>OsMADS57</i> | TATCCATCCTCTGCGATGCG      | GAAGTTGCATTCCCGCCAAG      | 57.4                          |

| Primer         | Upstream primer        | Downstream primer     | Annealing temperature<br>(°C) |
|----------------|------------------------|-----------------------|-------------------------------|
| <i>OsPIN1a</i> | TCATCTGGTCGCTCGTCTGC   | CGAACGTCGCCACCTTGTTTC | 60.0                          |
| <i>OsPIN2</i>  | CAACACCTACTCCAGCCTC    | TGGACCAGTCAAGAACCTC   | 55.0                          |
| <i>OsPIN9</i>  | GATACAAGATAGCGTCGTTCTC | ATGATGTCTGCGTGGACCT   | 55.5                          |
